# Supplementary material for: Functionalization of titanium substrate with multifunctional peptide OGP-NAC for the regulation of osteoimmunology
Source: Royal Society of Chemistry journal article supplement (doi:10.1039/c8bm01611a), 2019-01-01
Supplement: c8bm01611a1.pdf [file c8bm01611a1.pdf]

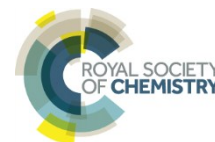

**Journal Name**

Supporting Information

**Electronic Supplemental Information**

for

**Functionalization of Titanium Substrate with Multifunctional Peptide OGP-NAC for the Regulation of Osteoimmunology**

Ju Liu<sup>a</sup>, Yu Tang<sup>b</sup>, Wei hu Yang<sup>a,\*</sup>, Bailong Tao<sup>a</sup>, Ye He<sup>a</sup>, Xinkun Shen<sup>a,c</sup>, Tingting Shen<sup>a</sup>, Chuanchuan Lin<sup>a</sup>, Kaiyong Cai<sup>a,\*</sup>

<sup>a</sup>*Key Laboratory of Biorheological Science and Technology of Ministry of Education, College of Bioengineering, Chongqing University, Chongqing 400044, China*

<sup>b</sup>*Department of Orthopedics, Xinqiao Hospital, the Army Medical University, Chongqing 400037, China*

<sup>c</sup>*School of Life Science, Chongqing University, Chongqing 400044, P. R. China*

*\*Corresponding author: Fax: +86-23-65102877; Tel: +86-23-65102507*

E-mail: kaiyong\_cai@cqu.edu.cn or and yangwei hu@cqu.edu.cn

**Table S1 The real-time polymerase chain reaction primers of osteoclast-related genes**

| Target gene    | Forward (5'-3')        | Reverse (5'-3')        |
|----------------|------------------------|------------------------|
| $\beta$ -actin | ATTTCTGAATGGCCCAGGT    | CTGCCTCAACACCTCAACC    |
| TNF- $\alpha$  | CAGGCGGTGCCTATGTCTC    | CGATCACCCCGAAGTTCAGTAG |
| IL-1 $\beta$   | TGCCACCTTTTGACAGTGATG  | TGATGTGCTGCTGCGAGATT   |
| RANK           | CAGGAGAGGCATTATGAGCA   | GGTACTTTCCTGGTTCGCAT   |
| TRAP           | GATGCCAGCGACAAGAGGTT   | CATACCAGGGGATGTTGCGAA  |
| CTSK           | GAAGAAGACTCACCAGAAGCAG | TCCAGGTTATGGGCAGAGATT  |
| MMP-9          | CTGGACAGCCAGACACTAAAG  | CTCGCGGCAAGTCTTCAGAG   |
| c-Fos          | GGTGAAGACCGTGTGAGGAG   | TATTCCGTTCCCTTCGGATT   |
| NFATc1         | CAACGCCCTGACCACCGATAG  | GGGAAGTCAGAAGTGGGTGGA  |

**Table S2 The real-time polymerase chain reaction primers of osteoblast-specific genes**

| Target gene | Forward (5'-3')       | Reverse (5'-3')        |
|-------------|-----------------------|------------------------|
| GAPDH       | GCTCTCCAGAACATCATCC   | TGCTTCACCACCTTCTTG     |
| Runx 2      | GCCGTAGAGAGCAGGGAAGAC | CTGGCTTGGATTAGGGAGTCAC |
| ALP         | AGCGACACGGACAAGAAGC   | GGCAAAGACCGCCACATC     |
| Col I       | CCTGAGCCAGCAGATTGA    | TCCGCTCTCCAGTCAG       |
| OCN         | GAGGGCAGTAAGGTGGTGAA  | COTCCTGGAAGCCAATGTG    |
| OPN         | GACAGCAACGGGAAGACC    | CAGGCTGGCTTTGGAAC      |
| OPG         | GCCCAGACGAGATTGAGAG   | CAGACTGTGGGTGACGGTT    |
| RANKL       | CATGAAACCTCAGGGAGCGT  | GTTGGACACCTGGACGCTAA   |
